# Supplementary material for: Prevalence and Prognostic Role of IDH Mutations in Acute Myeloid Leukemia: Results of the GIMEMA AML1516 Protocol
Source: MDPI journal article supplement (doi:10.3390/cancers14123012), 2022-06-18
Supplement: s1 [file s1]

**Table S1.** Univariate Logistic regression model for CR.

| Characteristic                | OR <sup>1</sup> | 95% CI <sup>1</sup> | <i>p</i> -value  |
|-------------------------------|-----------------|---------------------|------------------|
| <b>Gender</b>                 |                 |                     |                  |
| M                             | —               | —                   |                  |
| F                             | 1.65            | 0.97, 2.81          | 0.065            |
| <b>Age starting treatment</b> | 0.96            | 0.94, 0.98          | <b>&lt;0.001</b> |
| <b>WBC</b>                    | 1.00            | 1.00, 1.01          | 0.23             |
| <b>HB</b>                     | 1.06            | 0.93, 1.23          | 0.40             |
| <b>PLTS</b>                   | 1.00            | 1.00, 1.00          | 0.50             |
| <b>Blasts</b>                 | 1.00            | 0.99, 1.01          | 0.54             |
| <b>WHO PS</b>                 |                 |                     |                  |
| 0                             | —               | —                   |                  |
| I                             | 0.73            | 0.40, 1.32          | 0.29             |
| II                            | 0.20            | 0.07, 0.51          | <b>0.001</b>     |
| III                           | 0.41            | 0.08, 1.97          | 0.26             |
| <b>AML type</b>               |                 |                     |                  |
| de novo                       | —               | —                   |                  |
| secondary                     | 0.17            | 0.06, 0.39          | <b>&lt;0.001</b> |
| therapy related               | 0.59            | 0.19, 1.80          | 0.35             |
| <b>AML secondary</b>          |                 |                     |                  |
| MDS                           | —               | —                   |                  |
| PV                            | 0.00            |                     | >0.99            |
| MF                            | 1.90            | 0.08, 24.3          | 0.63             |
| <b>FLT3</b>                   |                 |                     |                  |
| wild type                     | —               | —                   |                  |
| ITD                           | 1.06            | 0.53, 2.12          | 0.88             |
| TKD                           | 5.78            | 1.00, 109           | 0.10             |
| ITD & TKD                     | 0.00            |                     | 0.99             |
| <b>NPM1</b>                   |                 |                     |                  |
| wild type                     | —               | —                   |                  |
| mutated                       | 2.26            | 1.20, 4.42          | <b>0.013</b>     |
| <b>TP53</b>                   |                 |                     |                  |
| wild type                     | —               | —                   |                  |
| mutated                       | 0.00            |                     | >0.99            |
| <b>CEBPA</b>                  |                 |                     |                  |
| wild type                     | —               | —                   |                  |
| mutated                       | 28,363,208      | 0.00, NA            | >0.99            |
| <b>IDH1</b>                   |                 |                     |                  |
| wild type                     | —               | —                   |                  |
| mutated                       | 1.34            | 0.64, 2.89          | 0.44             |
| <b>IDH2</b>                   |                 |                     |                  |
| wild type                     | —               | —                   |                  |
| mutated                       | 1.19            | 0.60, 2.37          | 0.62             |
| <b>IDH1/IDH2</b>              |                 |                     |                  |
| IDH1 IDH2 WT                  | —               | —                   |                  |
| IDH1 mutated                  | 1.38            | 0.65, 3.02          | 0.41             |
| IDH2 mutated                  | 1.26            | 0.63, 2.55          | 0.52             |
| <b>IDH1/2</b>                 |                 |                     |                  |
| IDH1/2 WT                     | —               | —                   |                  |
| IDH1/2 mutated                | 1.31            | 0.75, 2.30          | 0.35             |
| <b>Karyotype</b>              |                 |                     |                  |

| Characteristic          | OR <sup>1</sup> | 95% CI <sup>1</sup> | <i>p</i> -value  |
|-------------------------|-----------------|---------------------|------------------|
| other karyotype         | —               | —                   |                  |
| complex karyotype       | 0.46            | 0.16, 1.22          | 0.12             |
| <b>Treatment</b>        |                 |                     |                  |
| <i>Conventional CHT</i> | —               | —                   |                  |
| <i>Hypomethylating</i>  | 0.28            | 0.13, 0.57          | <b>&lt;0.001</b> |

<sup>1</sup>OR = Odds ratios CI = confidence interval.
